# Supplementary material for: Codon Usage Bias Analysis in Macronuclear Genomes of Ciliated Protozoa
Source: Microorganisms. 2023 Jul 18;11(7):1833. doi: 10.3390/microorganisms11071833 (PMC10384029; doi:10.3390/microorganisms11071833)
Supplement: Supplementary file 1 [file microorganisms-11-01833-s001.zip › Supplementary table.xlsx]

## Sheet: Table S1
Table S1. GenBank accession numbers of the 21 ciliate species.
Number	Class	Species	Accession number
1	Heterotrichea	Stentor roeselii	GCA_006503475.1
2	Heterotrichea	Stentor coeruleus	GCA_001970955.1
3	Spirotrichea	Euplotes vannus	SRX4184213
4	Spirotrichea	Euplotes octocarinatus	SRX1270715
5	Spirotrichea	Strombidium stylifer	GCA_010577775.2
6	Spirotrichea	Halteria grandinella	GCA_006369765.1
7	Spirotrichea	Stylonychia lemnae	GCA_000751175.1
8	Spirotrichea	Oxytricha trifallax	GCA_001297925.1
9	Spirotrichea	Pseudokeronopsis flava	GCA_013420745.1
10	Spirotrichea	Pseudokeronopsis carnea	GCA_006510595.1
11	Litostomatea	Entodinium caudatum	GCA_002087855.3
12	Oligohymenophorea	Tetrahymena borealis	GCA_000260095.1
13	Oligohymenophorea	Tetrahymena elliotti	GCA_000231825.2
14	Oligohymenophorea	Tetrahymena malaccensis	GCA_000231845.2
15	Oligohymenophorea	Tetrahymena thermophila	GCA_000189635.1
16	Oligohymenophorea	Ichthyophthirius multifiliis	GCA_000220395.1
17	Oligohymenophorea	Pseudocohnilembus persalinus	GCA_001447515.1
18	Oligohymenophorea	Uronema marinum	PRJNA487385
19	Oligohymenophorea	Paramecium biaurelia	GCA_000733385.1
20	Oligohymenophorea	Paramecium caudatum	GCA_000715435.1
21	Oligohymenophorea	Paramcium tetraurelia	GCA_000165425.1

## Sheet: Table S2
Table S2. The correlation analysis of the 21 ciliate species.
Stentor roeselii		GC	GC3	GC12	A3	T3	C3	G3	GRAVY	AROMA	Gene Length	CAI	ENc	P2	axis 1	axis 2
	GC		0.788**	0.890**	-0.386**	-0.427**	0.612**	0.438**	-0.017*	-0.258**	-0.130**	-0.798**	0.349**	0.639**	-0.341**	-0.686**
	GC3			0.421**	-0.427**	-0.597**	0.785**	0.543**	0.024**	-0.093**	-0.117**	-0.858**	0.392**	0.634**	-0.423**	-0.765**
	GC12				-0.252**	-0.187**	0.320**	0.243**	-0.043**	-0.312**	-0.105**	-0.540**	0.225**	0.473**	-0.189**	-0.443**
	A3					-0.471**	-0.144**	-0.491**	-0.464**	-0.382**	0.001	0.160**	-0.138**	0.074**	-0.392**	0.557**
	T3						-0.639**	-0.094**	0.388**	0.430**	0.113**	0.695**	-0.260**	-0.684**	0.760**	0.252**
	C3							-0.093**	0.121**	0.033**	-0.034**	-0.810**	0.379**	0.717**	-0.736**	-0.399**
	G3								-0.125**	-0.194**	-0.142**	-0.282**	0.116**	0.047**	0.319**	-0.689**
	GRAVY									0.565**	0.116**	-0.005	0.089**	-0.120**	0.077**	0.056**
	AROMA										0.084**	0.139**	-0.023**	-0.262**	0.140**	0.161**
	Gene Length											0.130**	0.448**	-0.084**	0.034**	0.101**
	CAI												-0.440**	-0.716**	0.703**	0.549**
	ENc													0.294**	-0.315**	-0.322**
	P2														-0.640**	-0.353**
	axis 1															-0.001
	axis 2
	**Significant at p-value ≤ 0.01 level (two-tailed)
	*Significant at p-value ≤ 0.05 level (two-tailed)
Stentor coeruleus		GC	GC3	GC12	A3	T3	C3	G3	GRAVY	AROMA	Gene Length	CAI	ENc	P2	axis 1	axis 2
	GC		0.526**	0.875**	-0.255**	-0.215**	0.409**	0.271**	-0.058**	-0.227**	-0.193**	-0.598**	0.220**	0.630**	0.389**	0.191**
	GC3			0.047**	-0.322**	-0.553**	0.736**	0.566**	-0.095**	-0.050**	-0.209**	-0.918**	0.437**	0.374**	0.548**	0.593**
	GC12				-0.117**	0.063**	0.060**	-0.004	-0.014**	-0.238**	-0.108**	-0.179**	0.009	0.526**	0.144**	-0.113**
	A3					-0.611**	-0.189**	-0.240**	-0.500**	-0.513**	0.040**	0.191**	-0.096**	0.119**	0.118**	-0.323**
	T3						-0.450**	-0.262**	0.519**	0.493**	0.139**	0.600**	-0.281**	-0.417**	-0.562**	-0.211**
	C3							-0.141**	0.078**	0.096**	-0.128**	-0.747**	0.384**	0.495**	0.804**	0.136**
	G3								-0.234**	-0.191**	-0.150**	-0.433**	0.171**	-0.056**	-0.178**	0.701**
	GRAVY									0.544**	0.111**	0.101**	0.016**	-0.166**	-0.122**	-0.082**
	AROMA										0.063**	0.112**	-0.001	-0.312**	-0.113**	-0.033**
	Gene Length											0.217**	0.327**	-0.101**	-0.133**	-0.118**
	CAI												-0.513**	-0.473**	-0.709**	-0.465**
	ENc													0.201**	0.403**	0.297**
	P2														0.482**	-0.115**
	axis 1															-0.002
	axis 2
	**Significant at p-value ≤ 0.01 level (two-tailed)
Euplotes vannus		GC	GC3	GC12	A3	T3	C3	G3	GRAVY	AROMA	Gene Length	CAI	ENc	P2	axis 1	axis 2
	GC		0.484**	0.789**	-0.160**	-0.261**	0.349**	0.231**	-0.123**	-0.322**	0.029**	-0.684**	0.163**	0.354**	-0.070**	0.143**
	GC3			-0.156**	-0.357**	-0.515**	0.559**	0.629**	0.122**	-0.168**	0.027**	-0.573**	0.232**	0.388**	-0.454**	0.146**
	GC12				0.070**	0.067**	0.001	-0.181**	-0.224**	-0.245**	0.013**	-0.369**	0.022**	0.127**	0.239**	0.059**
	A3					-0.617**	-0.404**	-0.033**	-0.458**	-0.514**	0.028**	0.093**	-0.038**	-0.084**	-0.376**	0.380**
	T3						-0.100**	-0.500**	0.318**	0.613**	-0.049**	0.398**	-0.160**	-0.249**	0.727**	-0.472**
	C3							-0.293**	0.101**	0.255**	0	-0.166**	0.071**	0.368**	0.189**	0.551**
	G3								0.046**	-0.433**	0.032**	-0.505**	0.200**	0.103**	-0.700**	-0.348**
	GRAVY									0.418**	-0.071**	0.032**	-0.064**	-0.006	-0.070**	-0.365**
	AROMA										-0.065**	0.323**	-0.116**	-0.131**	0.428**	-0.149**
	Gene Length											0.010*	0.518**	0.094**	-0.011*	0.026**
	CAI												-0.351**	-0.143**	0.343**	0.074**
	ENc													0.091**	-0.133**	-0.050**
	P2														-0.035**	0.069**
	axis 1															0
	axis 2
	**Significant at p-value ≤ 0.01 level (two-tailed)
	*Significant at p-value ≤ 0.05 level (two-tailed)
Euplotes octocarinatus		GC	GC3	GC12	A3	T3	C3	G3	GRAVY	AROMA	Gene Length	CAI	ENc	P2	axis 1	axis 2
	GC		0.522**	0.831**	-0.275**	-0.328**	0.513**	0.243**	0.103**	-0.058**	-0.089**	-0.581**	0.209**	0.708**	0.547**	-0.054**
	GC3			-0.042**	-0.546**	-0.611**	0.824**	0.672**	-0.021**	0.067**	-0.202**	-0.856**	0.394**	0.568**	0.831**	0.105**
	GC12				0.034**	0.015*	0.063**	-0.155**	0.134**	-0.112**	0.027**	-0.122**	-0.013*	0.458**	0.099**	-0.132**
	A3					-0.330**	-0.590**	-0.184**	-0.377**	-0.460**	0.012*	0.552**	-0.401**	-0.236**	-0.472**	-0.160**
	T3						-0.371**	-0.584**	0.380**	0.359**	0.216**	0.442**	-0.064**	-0.417**	-0.490**	0.033**
	C3							0.134**	0.238**	0.298**	-0.129**	-0.731**	0.338**	0.626**	0.810**	-0.058**
	G3								-0.348**	-0.272**	-0.184**	-0.542**	0.246**	0.177**	0.394**	0.258**
	GRAVY									0.573**	0.130**	-0.097**	0.125**	0.081**	0.072**	-0.080**
	AROMA										0.047**	-0.077**	0.111**	-0.006	0.087**	-0.041*
	Gene Length											0.162**	0.291**	-0.109**	-0.150**	-0.043**
	CAI												-0.571**	-0.531**	-0.750**	-0.394**
	ENc													0.200**	0.366**	0.463**
	P2														0.505**	-0.116**
	axis 1															0
	axis 2
	**Significant at p-value ≤ 0.01 level (two-tailed)
	*Significant at p-value ≤ 0.05 level (two-tailed)
Strombidium stylifer		GC	GC3	GC12	A3	T3	C3	G3	GRAVY	AROMA	Gene Length	CAI	ENc	P2	axis 1	axis 2
	GC		0.450**	0.476**	-0.345**	-0.406**	0.375**	0.257**	-0.050**	-0.156**	0.059**	0.511**	-0.200**	0.056**	0.503**	-0.029**
	GC3			-0.572**	-0.854**	-0.803**	0.762**	0.654**	0.073**	0.357**	0.006	0.810**	-0.361**	0.494**	0.931**	0.004
	GC12				0.524**	0.418**	-0.406**	-0.409**	-0.118**	-0.495**	0.049**	-0.329**	0.172**	-0.435**	-0.455**	-0.031**
	A3					0.376**	-0.696**	-0.506**	-0.245**	-0.438**	-0.019**	-0.672**	0.303**	-0.390**	-0.796**	0.017*
	T3						-0.560**	-0.586**	0.150**	-0.134**	0.012	-0.673**	0.297**	-0.433**	-0.747**	-0.027**
	C3							0.008	0.386**	0.562**	-0.006	0.675**	-0.342**	0.433**	0.698**	0.134**
	G3								-0.338**	-0.105**	0.016*	0.462**	-0.158**	0.256**	0.621**	-0.149**
	GRAVY									0.541**	0.046**	-0.095**	-0.003	0.117**	0.049**	-0.017*
	AROMA										-0.005	0.176**	-0.100**	0.325**	0.293**	-0.009
	Gene Length											-0.026**	0.549**	-0.01	0.015*	-0.082**
	CAI												-0.509**	0.538**	0.777**	0.426**
	ENc													-0.227**	-0.350**	-0.323**
	P2														0.443**	0.189**
	axis 1															0
	axis 2
	**Significant at p-value ≤ 0.01 level (two-tailed)
	*Significant at p-value ≤ 0.05 level (two-tailed)
Halteria grandinella		GC	GC3	GC12	A3	T3	C3	G3	GRAVY	AROMA	Gene Length	CAI	ENc	P2	axis 1	axis 2
	GC		0.883**	0.825**	-0.774**	-0.761**	0.782**	0.677**	-0.190**	-0.296**	-0.007	0.410**	-0.024**	0.499**	0.877**	0.089**
	GC3			0.463**	-0.865**	-0.873**	0.892**	0.758**	-0.126**	-0.090**	-0.01	0.587**	-0.086**	0.518**	0.969**	0.042**
	GC12				-0.420**	-0.386**	0.403**	0.366**	-0.206**	-0.451**	-0.003	0.068**	0.059**	0.319**	0.489**	0.117**
	A3					0.510**	-0.830**	-0.572**	-0.066**	-0.094**	0.020*	-0.542**	0.116**	-0.422**	-0.858**	-0.053**
	T3						-0.721**	-0.744**	0.281**	0.246**	-0.003	-0.479**	0.035**	-0.477**	-0.827**	-0.020*
	C3							0.382**	0.048**	0.094**	-0.007	0.674**	-0.130**	0.509**	0.906**	-0.150**
	G3								-0.327**	-0.319**	-0.01	0.227**	0.011	0.324**	0.675**	0.302**
	GRAVY									0.478**	-0.155**	-0.196**	-0.173**	-0.061**	-0.116**	0.083**
	AROMA										-0.088**	0.059**	-0.107**	-0.059**	-0.088**	-0.034**
	Gene Length											0.115**	0.596**	0.077**	0.001	-0.109**
	CAI												-0.121**	0.379**	0.608**	-0.641**
	ENc													0.079**	-0.087**	0.118**
	P2														0.475**	-0.179**
	axis 1															-0.001
	axis 2
	**Significant at p-value ≤ 0.01 level (two-tailed)
	*Significant at p-value ≤ 0.05 level (two-tailed)
Stylonychia lemnae		GC	GC3	GC12	A3	T3	C3	G3	GRAVY	AROMA	Gene Length	CAI	ENc	P2	axis 1	axis 2
	GC		0.717**	0.858**	-0.463**	-0.529**	0.684**	0.279**	-0.044**	-0.215**	-0.089**	-0.471**	0.039**	0.740**	0.699**	0.292**
	GC3			0.257**	-0.646**	-0.737**	0.808**	0.589**	-0.098**	-0.086**	-0.056**	-0.619**	0.218**	0.599**	0.677**	0.536**
	GC12				-0.165**	-0.191**	0.353**	-0.047**	0.012	-0.235**	-0.082**	-0.196**	-0.106**	0.584**	0.471**	0.01
	A3					-0.039**	-0.655**	-0.199**	-0.176**	-0.232**	0.005	0.400**	-0.202**	-0.348**	-0.438**	-0.388**
	T3						-0.479**	-0.594**	0.285**	0.318**	0.068**	0.457**	-0.106**	-0.477**	-0.498**	-0.358**
	C3							0	0.186**	0.173**	-0.070**	-0.389**	0.039**	0.677**	0.802**	0.309**
	G3								-0.423**	-0.383**	0.002	-0.519**	0.315**	0.088**	0.048**	0.486**
	GRAVY									0.573**	-0.060**	0.126**	-0.142**	0.071**	0.036**	-0.144**
	AROMA										-0.055**	0.188**	-0.083**	-0.043**	-0.046**	-0.109**
	Gene Length											0.024**	0.405**	-0.051**	-0.061**	-0.055**
	CAI												-0.522**	-0.168**	-0.066**	-0.851**
	ENc													-0.062**	-0.186**	0.485**
	P2														0.701**	0.015*
	axis 1															0
	axis 2
	**Significant at p-value ≤ 0.01 level (two-tailed)
	*Significant at p-value ≤ 0.05 level (two-tailed)
Oxytricha trifallax		GC	GC3	GC12	A3	T3	C3	G3	GRAVY	AROMA	Gene Length	CAI	ENc	P2	axis 1	axis 2
	GC		0.750**	0.875**	-0.517**	-0.548**	0.714**	0.262**	-0.018**	-0.161**	-0.132**	0.044**	-0.109**	0.781**	0.745**	0.269**
	GC3			0.342**	-0.661**	-0.755**	0.845**	0.521**	-0.052**	-0.037**	-0.129**	0.012*	-0.020**	0.674**	0.749**	0.465**
	GC12				-0.251**	-0.228**	0.406**	-0.001	0.011	-0.201**	-0.090**	0.059**	-0.135**	0.621**	0.516**	0.046**
	A3					0.014*	-0.687**	-0.134**	-0.182**	-0.228**	0.031**	-0.038**	-0.037**	-0.440**	-0.513**	-0.290**
	T3						-0.522**	-0.573**	0.228**	0.248**	0.150**	0.023**	0.065**	-0.513**	-0.550**	-0.367**
	C3							-0.013*	0.167**	0.171**	-0.108**	0.195**	-0.150**	0.715**	0.821**	0.269**
	G3								-0.364**	-0.341**	-0.065**	-0.281**	0.208**	0.120**	0.091**	0.439**
	GRAVY									0.575**	-0.042**	0.063**	-0.133**	0.087**	0.047**	-0.158**
	AROMA										-0.061**	0.080**	-0.079**	-0.015**	-0.035**	-0.086**
	Gene Length											0.032**	0.399**	-0.059**	-0.094**	-0.116**
	CAI												-0.558**	0.308**	0.515**	-0.670**
	ENc													-0.200**	-0.365**	0.451**
	P2														0.758**	0.019**
	axis 1															0.001
	axis 2
	**Significant at p-value ≤ 0.01 level (two-tailed)
	*Significant at p-value ≤ 0.05 level (two-tailed)
Pseudokeronopsis flava		GC	GC3	GC12	A3	T3	C3	G3	GRAVY	AROMA	Gene Length	CAI	ENc	P2	axis 1	axis 2
	GC		0.935**	0.583**	-0.890**	-0.901**	0.838**	0.822**	-0.219**	-0.186**	-0.209**	0.925**	-0.491**	0.631**	0.931**	-0.044**
	GC3			0.257**	-0.951**	-0.965**	0.888**	0.888**	-0.245**	-0.061**	-0.257**	0.988**	-0.546**	0.692**	0.990**	0.025*
	GC12				-0.247**	-0.245**	0.251**	0.205**	-0.034**	-0.366**	0.019	0.257**	-0.087**	0.134**	0.269**	-0.177**
	A3					0.838**	-0.866**	-0.823**	0.148**	-0.037**	0.223**	-0.935**	0.498**	-0.626**	-0.940**	0.017
	T3						-0.838**	-0.876**	0.309**	0.140**	0.267**	-0.958**	0.546**	-0.696**	-0.957**	-0.058**
	C3							0.576**	-0.011	0.155**	-0.225**	0.873**	-0.461**	0.676**	0.879**	0.069**
	G3								-0.424**	-0.263**	-0.231**	0.882**	-0.510**	0.553**	0.879**	-0.024*
	GRAVY									0.391**	0.112**	-0.295**	0.211**	-0.133**	-0.244**	-0.049**
	AROMA										0	-0.065**	0.057**	0.053**	-0.064**	0.089**
	Gene Length											-0.260**	0.490**	-0.174**	-0.252**	-0.235**
	CAI												-0.600**	0.695**	0.981**	0.068**
	ENc													-0.390**	-0.537**	-0.229**
	P2														0.663**	0.193**
	axis 1															-0.001
	axis 2
	**Significant at p-value ≤ 0.01 level (two-tailed)
	*Significant at p-value ≤ 0.05 level (two-tailed)
Pseudokeronopsis carnea		GC	GC3	GC12	A3	T3	C3	G3	GRAVY	AROMA	Gene Length	CAI	ENc	P2	axis 1	axis 2
	GC		0.914**	0.552**	-0.893**	-0.850**	0.870**	0.826**	-0.156**	-0.104**	-0.123**	-0.899**	-0.144**	0.536**	-0.883**	-0.301**
	GC3			0.165**	-0.948**	-0.957**	0.939**	0.919**	-0.249**	0.077**	-0.165**	-0.896**	-0.201**	0.696**	-0.988**	-0.103**
	GC12				-0.222**	-0.098**	0.183**	0.119**	0.132**	-0.409**	0.039**	-0.344**	0.064**	-0.129**	-0.116**	-0.519**
	A3					0.815**	-0.906**	-0.853**	0.110**	-0.163**	0.156**	0.871**	0.166**	-0.630**	0.929**	0.145**
	T3						-0.884**	-0.897**	0.354**	0.008	0.158**	0.837**	0.215**	-0.694**	0.951**	0.055**
	C3							0.728**	-0.105**	0.203**	-0.151**	-0.842**	-0.173**	0.668**	-0.929**	-0.106**
	G3								-0.377**	-0.079**	-0.156**	-0.823**	-0.204**	0.624**	-0.906**	-0.084**
	GRAVY									0.286**	0.056**	0.105**	0.111**	-0.248**	0.266**	-0.107**
	AROMA										-0.058**	0	0.001	0.152**	-0.098**	0.220**
	Gene Length											0.110**	0.266**	-0.160**	0.183**	-0.167**
	CAI												-0.014	-0.541**	0.861**	0.341**
	ENc													-0.162**	0.199**	-0.140**
	P2														-0.702**	0.222**
	axis 1															0
	axis 2
	**Significant at p-value ≤ 0.01 level (two-tailed)
Entodinium caudatum		GC	GC3	GC12	A3	T3	C3	G3	GRAVY	AROMA	Gene Length	CAI	ENc	P2	axis 1	axis 2
	GC		0.688**	0.932**	-0.225**	-0.376**	0.652**	0.503**	0.062**	-0.238**	-0.124**	-0.682**	0.434**	0.817**	0.573**	-0.119**
	GC3			0.378**	-0.353**	-0.522**	0.904**	0.792**	-0.009	-0.236**	-0.037**	-0.961**	0.685**	0.648**	0.859**	-0.028**
	GC12				-0.110**	-0.219**	0.379**	0.246**	0.084**	-0.185**	-0.140**	-0.389**	0.211**	0.718**	0.301**	-0.138**
	A3					-0.614**	-0.428**	-0.125**	-0.430**	-0.287**	-0.002	0.352**	-0.270**	-0.121**	-0.326**	0.053**
	T3						-0.373**	-0.555**	0.400**	0.461**	0.033**	0.490**	-0.332**	-0.437**	-0.428**	-0.025**
	C3							0.454**	0.104**	-0.140**	-0.007	-0.880**	0.629**	0.679**	0.783**	-0.108**
	G3								-0.168**	-0.293**	-0.066**	0.745**	0.529**	0.381**	0.672**	0.096**
	GRAVY									0.429**	0.002	-0.046**	0.008	0.058**	-0.034**	-0.033**
	AROMA										0.030**	0.230**	-0.180**	-0.239**	-0.223**	0.061**
	Gene Length											0.039**	0.294**	-0.076**	-0.030**	0.001
	CAI												-0.731**	-0.668**	-0.862**	0.078**
	ENc													0.443**	0.717**	-0.079**
	P2														0.519**	-0.221**
	axis 1															-0.001
	axis 2
	**Significant at p-value ≤ 0.01 level (two-tailed)
Tetrahymena borealis		GC	GC3	GC12	A3	T3	C3	G3	GRAVY	AROMA	Gene Length	CAI	ENc	P2	axis 1	axis 2
	GC		0.623**	0.874**	-0.635**	0.069**	0.681**	-0.026**	0.045**	-0.221**	-0.098**	0.138**	-0.164**	0.843**	0.756**	-0.064**
	GC3			0.165**	-0.619**	-0.363**	0.896**	0.371**	-0.034**	0.062**	-0.086**	-0.115**	0.039**	0.611**	0.707**	-0.399**
	GC12				-0.416**	0.313**	0.303**	-0.263**	0.078**	-0.318**	-0.070**	0.245**	-0.232**	0.684**	0.514**	0.168**
	A3					-0.507**	-0.754**	0.186**	-0.274**	-0.226**	0.01	-0.253**	0.098**	-0.616**	-0.723**	0.053**
	T3						-0.088**	-0.629**	0.362**	0.200**	0.083**	0.427**	-0.159**	0.060**	0.082**	0.376**
	C3							-0.080**	0.150**	0.174**	-0.082**	0.058**	-0.058**	0.704**	0.801**	-0.290**
	G3								-0.389**	-0.223**	-0.022**	-0.378**	0.210**	-0.102**	-0.087**	-0.290**
	GRAVY									0.423**	-0.049**	-0.002	-0.123**	0.116**	0.072**	0.025**
	AROMA										-0.023**	-0.005	0.076**	-0.081**	-0.040**	-0.027**
	Gene Length											-0.077**	0.408**	-0.108**	-0.101**	0.046**
	CAI												-0.619**	0.334**	0.453**	0.344**
	ENc													-0.251**	-0.313**	-0.083**
	P2														0.817**	0.062**
	axis 1															-0.001
	axis 2
	**Significant at p-value ≤ 0.01 level (two-tailed)
Tetrahymena elliotti		GC	GC3	GC12	A3	T3	C3	G3	GRAVY	AROMA	Gene Length	CAI	ENc	P2	axis 1	axis 2
	GC		0.603**	0.895**	-0.602**	0.056**	0.659**	-0.033**	0.084**	-0.245**	-0.106**	-0.069**	-0.121**	0.826**	0.728**	0.081**
	GC3			0.184**	-0.606**	-0.366**	0.892**	0.362**	0.020**	-0.011	-0.094**	-0.340**	0.041**	0.604**	0.690**	0.353**
	GC12				-0.403**	0.274**	0.314**	-0.243**	0.092**	-0.296**	-0.078**	0.105**	-0.172**	0.680**	0.512**	-0.098**
	A3					-0.518**	-0.722**	0.154**	-0.332**	-0.220**	0.039**	-0.044**	0.065**	-0.566**	-0.658**	-0.138**
	T3						-0.114**	-0.570**	0.368**	0.270**	0.055**	0.417**	-0.120**	0.013	0.028**	-0.218**
	C3							-0.099**	0.156**	0.097**	-0.108**	-0.151**	-0.031**	0.696**	0.779**	0.263**
	G3								-0.277**	-0.224**	0.015*	-0.436**	0.155**	-0.106**	-0.088**	0.235**
	GRAVY									0.423**	-0.122**	-0.088**	-0.124**	0.085**	0.064**	0.020**
	AROMA										-0.063**	0.044**	0.035**	-0.106**	-0.067**	-0.012
	Gene Length											-0.035**	0.440**	-0.099**	-0.098**	-0.064**
	CAI												-0.506**	0.133**	0.227**	-0.406**
	ENc													-0.173**	-0.235**	0.133**
	P2														0.809**	-0.025**
	axis 1															0
	axis 2
	**Significant at p-value ≤ 0.01 level (two-tailed)
	*Significant at p-value ≤ 0.05 level (two-tailed)
Tetrahymena malaccensis		GC	GC3	GC12	A3	T3	C3	G3	GRAVY	AROMA	Gene Length	CAI	ENc	P2	axis 1	axis 2
	GC		0.572**	0.908**	-0.538**	0.006	0.645**	-0.040**	0.006	-0.311**	-0.012*	-0.244**	0.031**	0.822**	0.685**	0.049**
	GC3			0.176**	-0.521**	-0.431**	0.868**	0.408**	-0.069**	-0.041**	-0.006	-0.571**	0.180**	0.575**	0.619**	0.097**
	GC12				-0.379**	0.228**	0.331**	-0.256**	0.042**	-0.353**	-0.012	-0.001	-0.055**	0.693**	0.506**	0.009
	A3					-0.545**	-0.680**	0.205**	-0.325**	-0.195**	0.008	0.057**	0.024**	-0.486**	-0.577**	-0.085**
	T3						-0.134**	-0.618**	0.411**	0.247**	-0.003	0.501**	-0.202**	-0.050**	0.002	-0.005
	C3							-0.100**	0.110**	0.037**	-0.041**	-0.318**	0.048**	0.675**	0.743**	0.087**
	G3								-0.339**	-0.150**	0.063**	-0.561**	0.273**	-0.089**	-0.126**	0.036**
	GRAVY									0.401**	-0.135**	-0.005	-0.155**	0.018**	0.043**	0.040**
	AROMA										-0.069**	0.043**	0.008	-0.178**	-0.122**	0.007
	Gene Length											-0.096**	0.488**	-0.031**	-0.070**	-0.022**
	CAI												-0.539**	-0.087**	0.037**	-0.144**
	ENc													-0.047**	-0.175**	0.045**
	P2														0.768**	0.011
	axis 1															-0.002
	axis 2
	**Significant at p-value ≤ 0.01 level (two-tailed)
	*Significant at p-value ≤ 0.05 level (two-tailed)
Tetrahymena thermophila		GC	GC3	GC12	A3	T3	C3	G3	GRAVY	AROMA	Gene Length	CAI	ENc	P2	axis 1	axis 2
	GC		0.534**	0.919**	-0.515**	0.022**	0.613**	-0.032**	-0.064**	-0.401**	-0.039**	-0.251**	0.028**	0.829**	-0.637**	0.138**
	GC3			0.157**	-0.528**	-0.425**	0.854**	0.447**	-0.032**	-0.015*	-0.087**	-0.644**	0.128**	0.549**	-0.549**	0.394**
	GC12				-0.356**	0.224**	0.318**	-0.246**	-0.060**	-0.461**	-0.004	0.007	-0.028**	0.712**	-0.488**	-0.022**
	A3					-0.544**	-0.656**	0.118**	-0.333**	-0.188**	0.016*	0.145**	0.029**	-0.469**	0.543**	-0.224**
	T3						-0.145**	-0.567**	0.386**	0.216**	0.069**	0.482**	-0.158**	-0.042**	-0.036**	-0.150**
	C3							-0.083**	0.075**	0.037**	-0.069**	-0.370**	0.037**	0.683**	-0.711**	0.285**
	G3								-0.191**	-0.094**	-0.048**	-0.598**	0.182**	-0.123**	0.171**	0.265**
	GRAVY									0.426**	-0.126**	-0.082**	-0.197**	-0.054**	0.035**	0.119**
	AROMA										-0.073**	-0.021**	-0.019**	-0.263**	0.145**	0.052**
	Gene Length											0.017**	0.456**	-0.063**	0.078**	-0.099**
	CAI												-0.411**	-0.103**	-0.065**	-0.513**
	ENc													-0.059**	0.172**	0.144**
	P2														-0.772**	0.023**
	axis 1															0.004
	axis 2
	**Significant at p-value ≤ 0.01 level (two-tailed)
	*Significant at p-value ≤ 0.05 level (two-tailed)
Ichthyophthirius multifiliis		GC	GC3	GC12	A3	T3	C3	G3	GRAVY	AROMA	Gene Length	CAI	ENc	P2	axis 1	axis 2
	GC		0.262**	0.917**	-0.063**	-0.155**	0.387**	-0.017	-0.170**	-0.452**	0.006	-0.318**	0.281**	0.781**	-0.040**	0.304**
	GC3			-0.144**	-0.407**	-0.429**	0.745**	0.710**	0.147**	0.110**	-0.041**	-0.948**	0.521**	0.234**	0.743**	0.211**
	GC12				0.103**	0.018	0.090**	-0.310**	-0.235**	-0.510**	0.023*	0.065**	0.073**	0.704**	-0.348**	0.225**
	A3					-0.651**	-0.350**	-0.240**	-0.487**	-0.508**	-0.003	0.375**	-0.194**	0.040**	-0.335**	-0.102**
	T3						-0.273**	-0.353**	0.360**	0.411**	0.038**	0.417**	-0.241**	-0.234**	-0.287**	-0.075**
	C3							0.059**	0.137**	0.142**	-0.014	-0.696**	0.412**	0.510**	0.334**	0.589**
	G3								0.075**	0.015	-0.047**	-0.684**	0.345**	-0.189**	0.759**	-0.306**
	GRAVY									0.531**	-0.018	-0.206**	0.083**	-0.143**	0.218**	0.039**
	AROMA										-0.063**	-0.092**	-0.038**	-0.363**	0.195**	0.018
	Gene Length											0.023*	0.406**	-0.021	-0.041**	-0.012
	CAI												-0.600**	-0.259**	-0.771**	-0.263**
	ENc													0.167**	0.478**	0.198**
	P2														-0.165**	0.416**
	axis 1															-0.007
	axis 2
	**Significant at p-value ≤ 0.01 level (two-tailed)
	*Significant at p-value ≤ 0.05 level (two-tailed)
Pseudocohnilembus persalinus		GC	GC3	GC12	A3	T3	C3	G3	GRAVY	AROMA	Gene Length	CAI	ENc	P2	axis 1	axis 2
	GC		0.675**	0.917**	-0.270**	-0.375**	0.655**	0.039**	0.236**	-0.131**	0.001	0.116**	-0.311**	0.756**	0.590**	0.075**
	GC3			0.325**	-0.431**	-0.525**	0.813**	0.314**	0.123**	0.013	0.090**	0.344**	-0.634**	0.556**	0.576**	0.410**
	GC12				-0.113**	-0.196**	0.400**	-0.120**	0.236**	-0.175**	-0.048**	-0.037**	-0.056**	0.668**	0.445**	-0.126**
	A3					-0.542**	-0.294**	-0.228**	-0.330**	-0.410**	-0.080**	-0.164**	0.274**	-0.091**	-0.088**	-0.183**
	T3						-0.480**	-0.077**	0.197**	0.375**	-0.008	-0.166**	0.331**	-0.432**	-0.453**	-0.210**
	C3							-0.298**	0.137**	0.021*	0.030**	0.147**	-0.260**	0.725**	0.853**	0.266**
	G3								-0.021*	-0.013	0.099**	0.324**	-0.613**	-0.270**	-0.447**	0.239**
	GRAVY									0.479**	-0.073**	-0.030**	-0.173**	0.182**	0.097**	0.006
	AROMA										-0.063**	0.028**	-0.098**	-0.105**	-0.114**	0.108**
	Gene Length											0.503**	-0.116**	-0.030**	-0.016	0.040**
	CAI												-0.602**	-0.003	-0.093**	0.414**
	ENc													-0.087**	0.093**	-0.627**
	P2														0.707**	-0.021*
	axis 1															0
	axis 2
	**Significant at p-value ≤ 0.01 level (two-tailed)
	*Significant at p-value ≤ 0.05 level (two-tailed)
Uronema marinum		GC	GC3	GC12	A3	T3	C3	G3	GRAVY	AROMA	Gene Length	CAI	ENc	P2	axis 1	axis 2
	GC		0.473**	0.917**	-0.167**	-0.228**	0.487**	0.074**	0.125**	-0.249**	-0.099**	-0.338**	-0.023**	0.771**	-0.037**	0.445**
	GC3			0.082**	-0.411**	-0.426**	0.689**	0.550**	0.190**	-0.056**	-0.138**	-0.881**	0.308**	0.348**	0.420**	0.514**
	GC12				-0.003	-0.065**	0.239**	-0.166**	0.055**	-0.257**	-0.049**	0.016*	-0.166**	0.715**	-0.232**	0.270**
	A3					-0.650**	-0.113**	-0.422**	-0.319**	-0.261**	-0.030**	0.312**	-0.113**	0.048**	-0.315**	0.025**
	T3						-0.462**	-0.040**	0.158**	0.305**	0.145**	0.424**	-0.145**	-0.337**	-0.037**	-0.453**
	C3							-0.227**	-0.015*	-0.026**	-0.087**	-0.494**	0.166**	0.642**	-0.172**	0.764**
	G3								0.272**	-0.046**	-0.086**	-0.613**	0.222**	-0.273**	0.762**	-0.189**
	GRAVY									0.356**	-0.076**	-0.307**	0.045**	0.041**	0.258**	0.001
	AROMA										-0.014*	0.028**	0.001	-0.171**	0.042**	-0.089**
	Gene Length											0.140**	0.298**	-0.112**	-0.077**	-0.087**
	CAI												-0.453**	-0.152**	-0.632**	-0.401**
	ENc													-0.119**	0.339**	0.137**
	P2														-0.349**	0.500**
	axis 1															0.004
	axis 2
	**Significant at p-value ≤ 0.01 level (two-tailed)
	*Significant at p-value ≤ 0.05 level (two-tailed)
Paramecium biaurelia		GC	GC3	GC12	A3	T3	C3	G3	GRAVY	AROMA	Gene Length	CAI	ENc	P2	axis 1	axis 2
	GC		0.456**	0.912**	-0.206**	-0.233**	0.411**	0.207**	-0.053**	-0.234**	-0.144**	-0.433**	0.233**	0.765**	0.294**	-0.314**
	GC3			0.050**	-0.453**	-0.511**	0.752**	0.631**	0.043**	0.032**	-0.215**	-0.905**	0.460**	0.404**	0.691**	-0.128**
	GC12				-0.023**	-0.026**	0.114**	-0.058**	-0.080**	-0.277**	-0.063**	-0.069**	0.050**	0.672**	0.012*	-0.293**
	A3					-0.535**	-0.479**	-0.123**	-0.359**	-0.435**	-0.043**	0.463**	-0.392**	-0.127**	-0.382**	0.035**
	T3						-0.251**	-0.480**	0.305**	0.389**	0.245**	0.412**	-0.058**	-0.261**	-0.287**	0.087**
	C3							-0.036**	0.196**	0.183**	-0.151**	-0.754**	0.418**	0.493**	0.628**	-0.461**
	G3								-0.165**	-0.166**	-0.148**	-0.486**	0.206**	0.033**	0.309**	0.349**
	GRAVY									0.489**	0.143**	-0.084**	0.121**	-0.01	0.013*	0.006
	AROMA										0.089**	-0.062**	0.135**	-0.182**	0.069**	0.092**
	Gene Length											0.203**	0.241**	-0.125**	-0.138**	0.052**
	CAI												-0.594**	-0.376**	-0.825**	0.068**
	ENc													0.179**	0.597**	0.083**
	P2														0.182**	-0.380**
	axis 1															0.001
	axis 2
	**Significant at p-value ≤ 0.01 level (two-tailed)
	*Significant at p-value ≤ 0.05 level (two-tailed)
Paramecium caudatum		GC	GC3	GC12	A3	T3	C3	G3	GRAVY	AROMA	Gene Length	CAI	ENc	P2	axis 1	axis 2
	GC		0.572**	0.742**	-0.352**	-0.396**	0.500**	0.339**	-0.132**	-0.238**	-0.094**	-0.596**	0.402**	0.663**	0.471**	-0.057**
	GC3			-0.126**	-0.630**	-0.679**	0.758**	0.717**	-0.046**	-0.054**	-0.178**	-0.951**	0.581**	0.399**	0.881**	0.104**
	GC12				0.089**	0.076**	-0.015*	-0.177**	-0.121**	-0.243**	0.032**	0.057**	0.01	0.475**	-0.150**	-0.154**
	A3					-0.143**	-0.498**	-0.429**	-0.285**	-0.340**	0.032**	0.620**	-0.475**	-0.172**	-0.557**	-0.201**
	T3						-0.495**	-0.508**	0.328**	0.390**	0.197**	0.626**	-0.291**	-0.347**	-0.596**	0.057**
	C3							0.088**	0.100**	0.132**	-0.130**	-0.774**	0.493**	0.482**	0.769**	-0.433**
	G3								-0.177**	-0.223**	-0.133**	-0.625**	0.360**	0.095**	0.523**	0.621**
	GRAVY									0.501**	0.094**	0.030**	0.006	-0.084**	-0.049**	-0.01
	AROMA										0.019*	0.056**	0.019*	-0.131**	-0.030**	-0.044**
	Gene Length											0.173**	0.196**	-0.053**	-0.173**	-0.029**
	CAI												-0.673**	-0.408**	-0.912**	-0.077**
	ENc													0.297**	0.625**	0.078**
	P2														0.235**	-0.145**
	axis 1															0
	axis 2
	**Significant at p-value ≤ 0.01 level (two-tailed)
	*Significant at p-value ≤ 0.05 level (two-tailed)
Paramcium tetraurelia		GC	GC3	GC12	A3	T3	C3	G3	GRAVY	AROMA	Gene Length	CAI	ENc	P2	axis 1	axis 2
	GC		0.586**	0.826**	-0.324**	-0.342**	0.445**	0.311**	-0.106**	-0.296**	-0.007	-0.587**	0.369**	0.548**	0.101**	0.328**
	GC3			0.028**	-0.544**	-0.593**	0.576**	0.692**	-0.001	-0.172**	-0.072**	-0.902**	0.461**	0.384**	0.444**	0.604**
	GC12				-0.022**	-0.010*	0.148**	-0.097**	-0.131**	-0.245**	0.041**	-0.098**	0.135**	0.409**	-0.184**	-0.015**
	A3					-0.353**	-0.326**	-0.365**	-0.270**	-0.285**	-0.073**	0.495**	-0.406**	-0.133**	-0.298**	-0.212**
	T3						-0.330**	-0.421**	0.260**	0.465**	0.150**	0.531**	-0.125**	-0.301**	-0.209**	-0.471**
	C3							-0.191**	0.140**	0.129**	-0.050**	-0.553**	0.337**	0.480**	-0.306**	0.652**
	G3								-0.125**	-0.320**	-0.042**	-0.595**	0.257**	0.038**	0.803**	0.151**
	GRAVY									0.463**	0.076**	-0.032**	0.082**	-0.030**	0.012*	0.016**
	AROMA										0.037**	0.179**	-0.003	-0.116**	-0.189**	-0.055**
	Gene Length											0.113**	0.366**	0.028**	-0.040**	-0.129**
	CAI												-0.526**	-0.326**	-0.429**	-0.678**
	ENc													0.253**	0.183**	0.354**
	P2														-0.057**	0.006
	axis 1															0
	axis 2
	**Significant at p-value ≤ 0.01 level (two-tailed)
	*Significant at p-value ≤ 0.05 level (two-tailed)

## Sheet: Table S3
Table S3. The ENc radio of the 21 ciliate species.
	Class boundary	Median	Amount	Frequency
Stentor roeselii	0-0.1	0.05	963	0.0470536
	0.1-0.2	0.15	9924	0.484902
	0.2-0.3	0.25	6612	0.323072
	0.3-0.4	0.35	2608	0.127431
	0.4-0.6	0.5	359	0.0175413
	total		20466
Stentor coeruleus	（-0.4）-0.1	-0.15	6665	0.210884
	0.1-0.2	0.15	17410	0.550862
	0.2-0.3	0.25	6253	0.197848
	0.3-0.4	0.35	1219	0.0385698
	0.4-0.6	0.5	58	0.00183515
	total		31605
Euplotes vannus	0-0.1	0.05	506	0.0121384
	0.1-0.2	0.15	15791	0.378808
	0.2-0.3	0.25	15770	0.378304
	0.3-0.4	0.35	4110	0.0985943
	0.4-0.6	0.5	509	0.0122103
	total		41686
Euplotes octocarinatus	0-0.1	0.05	229	0.00858707
	0.1-0.2	0.15	11701	0.438766
	0.2-0.3	0.25	11697	0.438616
	0.3-0.4	0.35	2781	0.104282
	0.4-0.6	0.5	260	0.00974951
	total		26668
Strombidium stylifer	0-0.1	0.05	211	0.00979527
	0.1-0.2	0.15	6749	0.31331
	0.2-0.3	0.25	9724	0.451418
	0.3-0.4	0.35	4185	0.194281
	0.4-0.6	0.5	672	0.0311963
	total		21541
Halteria grandinella	0-0.1	0.05	446	0.0292805
	0.1-0.2	0.15	6640	0.435924
	0.2-0.3	0.25	5488	0.360294
	0.3-0.4	0.35	2303	0.151195
	0.4-0.6	0.5	355	0.0233062
	total		15232
Stylonychia lemnae	0-0.1	0.05	161	0.00788365
	0.1-0.2	0.15	10302	0.504456
	0.2-0.3	0.25	7590	0.371658
	0.3-0.4	0.35	1965	0.0962198
	0.4-0.6	0.5	404	0.0197826
	total		20422
Oxytricha trifallax	0-0.1	0.05	510	0.0165107
	0.1-0.2	0.15	16069	0.520218
	0.2-0.3	0.25	10376	0.335912
	0.3-0.4	0.35	3057	0.0989673
	0.4-0.6	0.5	877	0.028392
	total		30889
Pseudokeronopsis flava	0-0.1	0.05	535	0.0528813
	0.1-0.2	0.15	4440	0.438865
	0.2-0.3	0.25	3658	0.36157
	0.3-0.4	0.35	1304	0.128892
	0.4-0.6	0.5	180	0.0177918
	total		10117
Pseudokeronopsis carnea	（-0.4）-0.1	-0.15	1682	0.123468
	0.1-0.2	0.15	6119	0.449167
	0.2-0.3	0.25	4166	0.305806
	0.3-0.4	0.35	1465	0.107539
	0.4-0.6	0.5	191	0.0140204
	total		13623
Entodinium caudatum	（-0.4）-0.1	-0.15	5516	0.124206
	0.1-0.2	0.15	27565	0.620694
	0.2-0.3	0.25	10099	0.227404
	0.3-0.4	0.35	1165	0.0262328
	0.4-0.6	0.5	65	0.00146363
	total		44410
Tetrahymena borealis	0-0.1	0.05	443	0.0210341
	0.1-0.2	0.15	11433	0.542852
	0.2-0.3	0.25	6414	0.304544
	0.3-0.4	0.35	2088	0.0991406
	0.4-0.6	0.5	683	0.0324296
	total		21061
Tetrahymena elliotti	（-0.4）-0.1	-0.15	374	0.0173357
	0.1-0.2	0.15	11826	0.54816
	0.2-0.3	0.25	6810	0.315658
	0.3-0.4	0.35	2078	0.0963196
	0.4-0.6	0.5	486	0.0225271
	total		21574
Tetrahymena malaccensis	（-0.4）-0.1	-0.15	530	0.0209007
	0.1-0.2	0.15	13786	0.543655
	0.2-0.3	0.25	7981	0.314733
	0.3-0.4	0.35	2513	0.0991009
	0.4-0.6	0.5	548	0.0216105
	total		25358
Tetrahymena thermophila	0-0.1	0.05	690	0.0274201
	0.1-0.2	0.15	13794	0.548164
	0.2-0.3	0.25	7533	0.299356
	0.3-0.4	0.35	2492	0.0990304
	0.4-0.6	0.5	655	0.0260292
	total		25164
Ichthyophthirius multifiliis	（-0.4）-0.1	-0.15	656	0.0861458
	0.1-0.2	0.15	4367	0.573473
	0.2-0.3	0.25	2035	0.267236
	0.3-0.4	0.35	489	0.0642154
	0.4-0.6	0.5	68	0.00892974
	total		7615
Pseudocohnilembus persalinus	0-0.1	0.05	537	0.0407528
	0.1-0.2	0.15	6728	0.510587
	0.2-0.3	0.25	4397	0.333687
	0.3-0.4	0.35	1023	0.0776353
	0.4-0.6	0.5	492	0.0373378
	total		13177
Uronema marinum	（-0.4）-0.1	-0.15	676	0.0298903
	0.1-0.2	0.15	12417	0.549036
	0.2-0.3	0.25	7595	0.335824
	0.3-0.4	0.35	1546	0.0683587
	0.4-0.6	0.5	382	0.0168907
	total		22616
Paramecium biaurelia	0-0.1	0.05	899	0.0245702
	0.1-0.2	0.15	21634	0.591271
	0.2-0.3	0.25	11595	0.316899
	0.3-0.4	0.35	2345	0.0640903
	0.4-0.5	0.45	116	0.00317035
	total		36589
Paramecium caudatum	0-0.1	0.05	679	0.0388644
	0.1-0.2	0.15	9458	0.541354
	0.2-0.3	0.25	5511	0.315437
	0.3-0.4	0.35	1623	0.0928968
	0.4-0.6	0.5	146	0.00835671
	total		17471
Paramecium tetraurelia	0-0.1	0.05	646	0.016741
	0.1-0.2	0.15	16502	0.427646
	0.2-0.3	0.25	15796	0.40935
	0.3-0.4	0.35	5222	0.135327
	0.4-0.6	0.5	422	0.010936
	total		38588

## Sheet: Table S4
Table S4. The RSCU value of the 21 ciliate species.
RSCU	Stentor roeselii	Stentor coeruleus	Euplotes vannus	Euplotes octocarinatus	Strombidium stylifer	Halteria grandinella	Stylonychia lemnae	Oxytricha trifallax	Pseudokeronopsis flava	Pseudokeronopsis carnea	Entodinium caudatum	Tetrahymena borealis	Tetrahymena elliotti	Tetrahymena malaccensis	Tetrahymena thermophila	Ichthyophthirius multifiliis	Pseudocohnilembus persalinus	Uronema marinum	Paramecium biaurelia	Paramecium caudatum	Paramcium tetraurelia
TTT	1.25	1.5	1.08	1.44	0.38	0.84	1.17	1.11	1	1.15	1.58	1.29	1.43	1.45	1.47	1.62	1.59	1.71	1.55	1.42	1.37
TTC	0.75	0.5	0.92	0.56	1.62	1.16	0.83	0.89	1	0.85	0.42	0.71	0.57	0.55	0.53	0.38	0.41	0.29	0.45	0.58	0.63
TTA	1.41	2.17	1.12	1.96	0.26	0.79	1.55	1.64	0.87	1.31	3.92	2.59	2.56	2.51	2.55	3.5	3.3	3.97	3.06	2.41	2.15
TTG	1.2	0.87	1.1	0.81	0.77	0.94	1.06	1.23	1.4	0.99	0.82	0.85	0.95	0.95	0.94	0.73	1.16	0.78	1.17	1.21	1.41
CTT	1.69	1.71	1.22	1.64	0.89	1.26	1.39	1.25	0.96	0.92	0.7	1.25	1.28	1.21	1.23	1.01	0.76	0.6	0.85	0.9	0.85
CTC	0.56	0.36	0.97	0.48	1.93	1.37	0.57	0.62	0.91	0.93	0.13	0.46	0.4	0.41	0.39	0.15	0.15	0.07	0.23	0.42	0.43
CTA	0.57	0.68	0.82	0.85	0.48	0.78	0.99	0.83	0.47	0.62	0.33	0.68	0.64	0.7	0.69	0.51	0.47	0.5	0.56	0.72	0.76
CTG	0.57	0.22	0.76	0.26	1.66	0.86	0.44	0.43	1.4	1.23	0.09	0.16	0.17	0.22	0.21	0.1	0.16	0.09	0.13	0.35	0.39
ATT	1.42	1.31	1.15	1.57	0.75	1.06	1.4	1.41	1.33	1.31	1.37	1.56	1.56	1.49	1.5	1.46	1.58	1.46	1.56	1.4	1.37
ATC	0.95	0.52	0.86	0.46	1.92	1.03	0.63	0.65	1.08	1.04	0.24	0.48	0.42	0.42	0.4	0.19	0.23	0.17	0.39	0.46	0.58
ATA	0.64	1.16	0.99	0.96	0.34	0.91	0.96	0.95	0.6	0.66	1.39	0.96	1.02	1.09	1.1	1.34	1.19	1.37	1.05	1.14	1.06
GTT	1.68	1.93	1.29	1.81	0.79	1.02	1.53	1.51	1.05	1.17	1.9	1.92	2.02	1.92	1.92	1.83	2.04	1.78	1.82	1.6	1.55
GTC	0.96	0.5	0.9	0.41	1.58	0.93	0.67	0.65	0.7	0.74	0.39	0.44	0.47	0.47	0.45	0.32	0.38	0.15	0.37	0.44	0.59
GTA	0.62	1.03	1.02	1.34	0.52	0.84	1.19	1.1	0.86	0.89	1.31	1.28	1.18	1.23	1.24	1.55	1.2	1.72	1.3	1.25	1.1
GTG	0.75	0.53	0.79	0.44	1.11	1.21	0.62	0.74	1.39	1.19	0.4	0.36	0.33	0.39	0.38	0.3	0.38	0.35	0.5	0.71	0.76
TCT	1.37	1.45	1.33	1.52	0.96	1.18	1.48	1.42	1.03	1.23	1.63	2.03	1.94	1.85	1.85	1.93	1.8	2.06	1.74	1.25	1.34
TCC	0.53	0.33	0.82	0.25	1.05	0.85	0.42	0.46	1.11	0.83	0.41	0.4	0.29	0.3	0.29	0.36	0.44	0.35	0.34	0.57	0.64
TCA	1.74	1.83	1.5	2.09	1.13	1.35	1.76	1.73	1	1	1.93	1.41	1.53	1.5	1.54	1.46	1.23	1.3	2.02	1.84	1.77
TCG	0.49	0.26	0.37	0.26	0.81	0.52	0.22	0.23	0.83	0.66	0.21	0.14	0.1	0.16	0.16	0.28	0.26	0.08	0.12	0.26	0.3
CCT	1.89	1.9	1.37	1.52	1.05	1.24	1.58	1.43	1.03	1.26	1.88	2.32	2.22	2.18	2.17	2.26	1.98	2.45	1.77	1.5	1.53
CCC	0.36	0.18	0.71	0.17	0.81	1.13	0.43	0.54	0.98	0.92	0.28	0.4	0.34	0.33	0.31	0.27	0.65	0.43	0.22	0.45	0.52
CCA	1.22	1.71	1.65	2.13	1.44	1.23	1.82	1.9	1.25	1.13	1.64	1.23	1.4	1.41	1.44	1.25	1.17	1.05	1.95	1.93	1.79
CCG	0.53	0.21	0.27	0.18	0.69	0.4	0.17	0.12	0.74	0.69	0.2	0.05	0.04	0.07	0.08	0.21	0.2	0.07	0.07	0.13	0.17
ACT	1.89	1.73	1.4	1.7	1.21	1.28	1.95	1.94	0.96	1.15	1.81	2.09	1.99	1.95	1.94	0.95	1.91	1.97	1.78	1.5	1.54
ACC	0.66	0.44	0.83	0.3	1.29	1.07	0.54	0.55	1.21	1.13	0.37	0.43	0.39	0.39	0.38	0.28	0.57	0.39	0.33	0.53	0.61
ACA	1.11	1.66	1.42	1.84	0.81	1.22	1.36	1.35	1.03	1.12	1.66	1.38	1.54	1.55	1.57	1.61	1.34	1.58	1.81	1.8	1.63
ACG	0.35	0.17	0.34	0.15	0.69	0.43	0.15	0.16	0.79	0.6	0.16	0.09	0.07	0.11	0.11	0.16	0.19	0.06	0.09	0.16	0.22
GCT	1.7	2.09	1.53	1.61	1.26	1.11	1.87	1.82	0.9	1.09	1.79	2.19	2.15	2.07	2.06	1.93	1.78	2.23	1.76	1.49	1.5
GCC	0.57	0.35	0.79	0.25	1.33	1.08	0.55	0.58	1.13	1.09	0.49	0.43	0.4	0.41	0.38	0.43	0.81	0.46	0.42	0.54	0.67
GCA	1.14	1.29	1.41	2	0.94	1.31	1.43	1.43	1.17	1.1	1.51	1.32	1.4	1.43	1.47	1.45	1.21	1.25	1.74	1.83	1.65
GCG	0.59	0.27	0.27	0.14	0.46	0.5	0.16	0.17	0.8	0.72	0.21	0.06	0.05	0.09	0.1	0.2	0.21	0.07	0.08	0.13	0.18
TAT	1.1	1.56	1.27	1.45	0.48	1.05	1.31	1.22	0.95	1.01	1.82	1.48	1.45	1.41	1.43	1.73	1.53	1.65	1.67	1.47	1.46
TAC	0.9	0.44	0.73	0.55	1.52	0.95	0.69	0.78	1.05	0.99	0.18	0.52	0.55	0.59	0.57	0.27	0.47	0.35	0.33	0.53	0.54
CAT	1.32	1.65	1.28	1.56	0.68	1.07	1.44	1.33	0.93	1	1.77	1.44	1.48	1.4	1.44	1.74	1.38	1.66	1.75	1.52	1.51
CAC	0.68	0.35	0.72	0.44	1.32	0.93	0.56	0.67	1.07	1	0.23	0.56	0.52	0.6	0.56	0.26	0.62	0.34	0.25	0.48	0.49
CAA	1.24	1.52	1.25	1.56	0.66	1.05	1.37	1.42	0.89	1.07	1.79	1.7	1.68	1.61	1.62	1.73	1.63	1.79	1.75	1.49	1.53
CAG	0.76	0.48	0.75	0.44	1.34	0.95	0.63	0.58	1.11	0.93	0.21	0.3	0.32	0.39	0.38	0.27	0.35	0.21	0.25	0.51	0.47
AAT	1.17	1.43	1.28	1.45	0.61	1.09	1.42	1.32	1.06	1.01	1.8	1.58	1.54	1.49	1.52	1.69	1.64	1.72	1.73	1.57	1.54
AAC	0.83	0.57	0.72	0.55	1.39	0.91	0.58	0.68	0.94	0.99	0.2	0.42	0.46	0.51	0.48	0.31	0.36	0.28	0.27	0.43	0.46
AAA	1.41	1.63	1.12	1.33	0.46	0.85	1.17	1.22	0.98	1.09	1.76	1.36	1.46	1.46	1.48	1.72	1.78	1.82	1.54	1.41	1.36
AAG	0.59	0.37	0.88	0.67	1.54	1.15	0.83	0.78	1.02	0.91	0.24	0.64	0.54	0.54	0.52	0.28	0.22	0.18	0.46	0.59	0.64
GAT	1.1	1.56	1.31	1.62	0.75	1.17	1.51	1.42	1.11	1.14	1.79	1.71	1.67	1.61	1.62	1.72	1.53	1.77	1.78	1.67	1.6
GAC	0.9	0.44	0.69	0.38	1.25	0.83	0.49	0.58	0.89	0.86	0.21	0.29	0.33	0.39	0.38	0.28	0.47	0.23	0.22	0.33	0.4
GAA	1.52	1.6	1.25	1.46	0.81	0.93	1.24	1.29	1.1	1.16	1.81	1.6	1.62	1.59	1.6	1.79	1.72	1.84	1.64	1.51	1.45
GAG	0.48	0.4	0.75	0.54	1.19	1.07	0.76	0.71	0.9	0.84	0.19	0.4	0.38	0.41	0.4	0.21	0.28	0.16	0.36	0.49	0.55
TGT	1.11	1.35	1.08	1.21	0.5	0.63	0.94	0.97	0.72	0.95	1.4	1.21	1.18	1.1	1.11	1.5	1.51	1.67	1.6	1.33	1.26
TGC	0.89	0.65	0.92	0.79	1.5	1.37	1.06	1.03	1.28	1.05	0.6	0.79	0.82	0.9	0.89	0.5	0.49	0.33	0.4	0.67	0.74
CGT	0.63	0.81	0.25	0.28	0.32	0.4	0.19	0.3	0.65	1.08	0.39	0.59	1.53	0.51	0.49	0.45	0.09	0.16	0.37	0.29	0.25
CGC	0.29	0.2	0.19	0.09	0.5	0.88	0.12	0.21	0.88	1.26	0.09	0.19	0.15	0.2	0.2	0.09	0.02	0.01	0.06	0.1	0.11
CGA	1.13	0.54	0.64	0.41	0.71	0.41	0.28	0.33	0.67	0.63	0.36	0.11	0.09	0.13	0.15	0.35	0.21	0.13	0.37	0.48	0.53
CGG	0.26	0.16	0.23	0.06	0.55	0.25	0.05	0.05	0.54	0.63	0.05	0.02	0.01	0.01	0.02	0.05	0.04	0.03	0.03	0.08	0.11
AGT	1.28	1.48	1.01	1.19	0.64	0.91	1.32	1.33	0.91	1.13	1.45	1.35	1.36	1.26	1.29	1.58	1.72	1.88	1.48	1.48	1.33
AGC	0.6	0.64	0.97	0.7	1.4	1.19	0.8	0.84	1.11	1.16	0.37	0.66	0.78	0.93	0.87	0.4	0.55	0.33	0.3	0.61	0.62
AGA	2.43	3.01	3.31	4.52	2.13	2.15	4.4	4.25	1.61	1.46	4.25	4.42	4.54	4.36	4.34	4.29	4.82	5.04	4.58	3.91	3.79
AGG	1.25	1.27	1.38	0.64	1.79	1.9	0.95	0.85	1.65	0.94	0.86	0.67	0.67	0.79	0.8	0.78	0.83	0.63	0.58	1.14	1.22
GGT	0.78	1.16	0.82	0.82	0.66	0.84	1.15	1.23	0.83	1.12	1.11	1.52	1.49	1.48	1.5	1.16	0.96	1.38	1.26	1.05	0.94
GGC	0.58	0.4	0.68	0.3	1.25	1.22	0.69	0.7	0.91	1.04	0.31	0.37	0.4	0.47	0.47	0.29	0.42	0.16	0.24	0.38	0.49
GGA	1.98	1.49	1.85	2.63	1.43	1.09	1.76	1.6	1.48	1.13	2.25	1.81	1.85	1.78	1.78	2.22	2.14	1.96	2.21	2.07	2.06
GGG	0.66	0.95	0.64	0.25	0.66	0.85	0.4	0.47	0.78	0.71	0.32	0.3	0.26	0.26	0.26	0.33	0.48	0.5	0.28	0.49	0.51

## Sheet: Table S5
Table S5. The putative optimal codons of the 21 ciliate species.
Stentor roeselii	Amino Acid	codons	r	p-value	family_number	p-value/n
	I	ATT	-0.156494	2.33702e-112	3	0.0166667
	L	TTA	-0.112385	1.62433e-58	6	0.00833333
	D	GAT	-0.327684	0	2	0.025
	E	GAA	-0.157218	2.14939e-113	2	0.025
	A	GCT	-0.129214	6.53003e-77	4	0.0125
	K	AAA	-0.128943	1.35456e-76	2	0.025
	N	AAT	-0.307546	0	2	0.025
	Y	TAT	-0.249401	9.45901e-288	2	0.025
	T	ACT	-0.161588	9.28256e-120	4	0.0125
	S	TCT	-0.110233	2.36937e-56	6	0.00833333
	H	CAT	-0.198121	3.22789e-180	2	0.025
	G	GGA	-0.171757	2.79911e-135	4	0.0125
	V	GTT	-0.181266	1.06413e-150	4	0.0125
	F	TTT	-0.240012	5.17503e-266	2	0.025
	Q	CAA	-0.120579	3.81526e-67	2	0.025
	R	AGA	-0.318029	0	6	0.00833333
	P	CCT	-0.128004	1.67831e-75	4	0.0125
Stentor coeruleus	Amino Acid	codons	r	p-value	family_number	p-value/n
	L	TTA	-0.197119	2.44556e-274	6	0.00833333
	N	AAT	-0.266457	0	2	0.025
	D	GAT	-0.307148	0	2	0.025
	A	GCT	-0.127854	2.74616e-115	4	0.0125
	S	TCA	-0.0650138	5.86171e-31	6	0.00833333
	R	AGA	-0.418014	0	6	0.00833333
	K	AAA	-0.0157376	0.00514429	2	0.025
	I	ATT	-0.165301	2.04462e-192	3	0.0166667
	F	TTT	-0.208301	8.32812e-307	2	0.025
	H	CAT	-0.229166	0	2	0.025
	C	TGT	-0.0477955	1.8714e-17	2	0.025
	T	ACT	-0.126187	2.49669e-112	4	0.0125
	V	GTT	-0.189112	2.84468e-252	4	0.0125
	G	GGA	-0.169659	9.84116e-203	4	0.0125
	Y	TAT	-0.239589	0	2	0.025
	P	CCT	-0.10683	7.1238e-81	4	0.0125
	Q	CAA	-0.160753	5.96742e-182	2	0.025
	E	GAA	-0.141691	2.10916e-141	2	0.025
Euplotes vannus	Amino Acid	codons	r	p-value	family_number	p-value/n
	G	GGA	-0.14005	1.39179e-181	4	0.0125
	Y	TAT	-0.106493	2.11395e-105	2	0.025
	E	GAA	-0.102921	1.53547e-98	2	0.025
	F	TTT	-0.0805279	6.25544e-61	2	0.025
	V	GTT	-0.112117	1.09501e-116	4	0.0125
	A	GCT	-0.0601371	1.03736e-34	4	0.0125
	D	GAT	-0.11604	6.55205e-125	2	0.025
	N	AAT	-0.124108	9.85595e-143	2	0.025
	L	CTT	-0.0874023	1.7269e-71	6	0.00833333
	T	ACT	-0.0833073	4.2855e-65	4	0.0125
	Q	CAA	-0.135912	4.92408e-171	2	0.025
	I	ATT	-0.107836	4.82872e-108	3	0.0166667
	S	TCT	-0.0570989	1.87628e-31	6	0.00833333
	K	AAA	-0.11226	5.55803e-117	2	0.025
	R	AGA	-0.295377	0	6	0.00833333
	H	CAT	-0.103634	6.8447e-100	2	0.025
	P	CCA	-0.0750189	4.26912e-53	4	0.0125
Euplotes octocarinatus	Amino Acid	codons	r	p-value	family_number	p-value/n
	F	TTT	-0.152205	6.08624e-138	2	0.025
	Q	CAA	-0.212416	1.03425e-269	2	0.025
	D	GAT	-0.209356	6.9589e-262	2	0.025
	R	AGA	-0.449867	0	6	0.00833333
	T	ACA	-0.100284	1.4361e-60	4	0.0125
	G	GGA	-0.272811	0	4	0.0125
	L	TTA	-0.154537	3.43465e-142	6	0.00833333
	H	CAT	-0.210502	8.44993e-265	2	0.025
	I	ATT	-0.16969	1.88861e-171	3	0.0166667
	N	AAT	-0.187178	8.03693e-209	2	0.025
	K	AAA	-0.104555	1.04761e-65	2	0.025
	E	GAA	-0.168503	4.70893e-169	2	0.025
	S	TCA	-0.136331	8.28453e-111	6	0.00833333
	P	CCA	-0.180527	3.77333e-194	4	0.0125
	A	GCA	-0.144565	1.70136e-124	4	0.0125
	Y	TAT	-0.194563	8.85163e-226	2	0.025
	V	GTT	-0.100067	2.5898e-60	4	0.0125
Strombidium stylifer	Amino Acid	codons	r	p-value	family_number	p-value/n
	E	GAG	-0.253113	0	2	0.025
	H	CAC	-0.181598	4.29406e-159	2	0.025
	K	AAG	-0.251036	7.75609e-307	2	0.025
	A	GCC	-0.136684	2.46282e-90	4	0.0125
	N	AAC	-0.232799	5.77047e-263	2	0.025
	L	CTC	-0.187316	2.54535e-169	6	0.00833333
	V	GTC	-0.165889	9.98272e-133	4	0.0125
	Y	TAC	-0.236048	1.64419e-270	2	0.025
	I	ATC	-0.262941	0	3	0.0166667
	F	TTC	-0.244476	1.2582e-290	2	0.025
	T	ACC	-0.0704461	4.11868e-25	4	0.0125
	G	GGA	-0.0639463	5.75609e-21	4	0.0125
	R	AGA	-0.0961956	1.85453e-45	6	0.00833333
	C	TGC	-0.102577	1.77256e-51	2	0.025
	D	GAC	-0.210307	6.8096e-214	2	0.025
	Q	CAG	-0.264672	0	2	0.025
	S	TCC	-0.0453669	2.71082e-11	6	0.00833333
Halteria grandinella	Amino Acid	codons	r	p-value	family_number	p-value/n
	Q	CAG	-0.0421761	1.91734e-07	2	0.025
	I	ATC	-0.0272902	0.000755927	3	0.0166667
	K	AAG	-0.055657	6.2495e-12	2	0.025
	R	AGA	-0.0291382	0.000322352	6	0.00833333
	H	CAC	-0.0196985	0.0150498	2	0.025
	E	GAG	-0.0316998	9.11594e-05	2	0.025
Stylonychia lemnae	Amino Acid	codons	r	p-value	family_number	p-value/n
	K	AAA	-0.122761	2.10918e-69	2	0.025
	D	GAT	-0.199654	1.18656e-182	2	0.025
	F	TTT	-0.0230156	0.00100438	2	0.025
	G	GGA	-0.180098	1.92399e-148	4	0.0125
	Q	CAA	-0.329944	0	2	0.025
	V	GTT	-0.214517	3.33281e-211	4	0.0125
	Y	TAT	-0.0884816	8.82863e-37	2	0.025
	P	CCA	-0.205766	4.00926e-194	4	0.0125
	A	GCT	-0.129952	1.29192e-77	4	0.0125
	N	AAT	-0.122905	1.45984e-69	2	0.025
	R	AGA	-0.476919	0	6	0.00833333
	S	TCA	-0.188493	1.1501e-162	6	0.00833333
	L	TTA	-0.13239	1.64756e-80	6	0.00833333
	I	ATT	-0.203349	1.5287e-189	3	0.0166667
	E	GAA	-0.194947	4.50995e-174	2	0.025
	H	CAT	-0.0987882	1.83756e-45	2	0.025
	T	ACT	-0.107259	2.5488e-53	4	0.0125
Oxytricha trifallax	Amino Acid	codons	r	p-value	family_number	p-value/n
	L	CTT	-0.106016	6.62245e-78	6	0.00833333
	H	CAT	-0.0288842	3.82786e-07	2	0.025
	V	GTT	-0.1711	1.38552e-201	4	0.0125
	R	AGA	-0.533274	0	6	0.00833333
	G	GGA	-0.140859	1.24192e-136	4	0.0125
	I	ATT	-0.156954	1.4713e-169	3	0.0166667
	P	CCA	-0.230034	0	4	0.0125
	E	GAA	-0.0997039	4.46315e-69	2	0.025
	F	TTC	-0.0541071	1.79881e-21	2	0.025
	T	ACT	-0.104963	2.14454e-76	4	0.0125
	A	GCT	-0.136807	6.31719e-129	4	0.0125
	S	TCA	-0.219756	0	6	0.00833333
	Q	CAA	-0.309833	0	2	0.025
	K	AAG	-0.0669382	5.11073e-32	2	0.025
	N	AAC	-0.0380579	2.21755e-11	2	0.025
	D	GAT	-0.063382	7.13592e-29	2	0.025
Pseudokeronopsis flava	Amino Acid	codons	r	p-value	family_number	p-value/n
	G	GGC	-0.322966	2.72613e-244	4	0.0125
	A	GCG	-0.18431	5.27393e-78	4	0.0125
	K	AAG	-0.503644	0	2	0.025
	C	TGC	-0.246665	4.24897e-140	2	0.025
	F	TTC	-0.464853	0	2	0.025
	H	CAC	-0.334041	3.19738e-262	2	0.025
	D	GAC	-0.454961	0	2	0.025
	S	AGC	-0.329902	1.96569e-255	6	0.00833333
	T	ACC	-0.131955	1.56637e-40	4	0.0125
	Q	CAG	-0.458741	0	2	0.025
	P	CCC	-0.195527	9.72444e-88	4	0.0125
	E	GAG	-0.47116	0	2	0.025
	V	GTG	-0.402867	0	4	0.0125
	N	AAC	-0.444965	0	2	0.025
	R	AGG	-0.276467	6.47411e-177	6	0.00833333
	Y	TAC	-0.425471	0	2	0.025
	I	ATC	-0.431292	0	3	0.0166667
	L	CTG	-0.448842	0	6	0.00833333
Pseudokeronopsis carnea	Amino Acid	codons	r	p-value	family_number	p-value/n
	N	AAC	-0.198048	1.54325e-120	2	0.025
	E	GAG	-0.25025	1.4189e-193	2	0.025
	I	ATC	-0.187047	1.68396e-107	3	0.0166667
	T	ACC	-0.0253823	0.00304889	4	0.0125
	C	TGC	-0.0388669	5.68576e-06	2	0.025
	K	AAG	-0.226389	7.34291e-158	2	0.025
	L	CTG	-0.134538	4.7495e-56	6	0.00833333
	V	GTG	-0.122531	1.00044e-46	4	0.0125
	P	CCC	-0.0508331	2.9132e-09	4	0.0125
	R	AGA	-0.09753	3.74333e-30	6	0.00833333
	Q	CAG	-0.205876	2.64367e-130	2	0.025
	G	GGG	-0.073344	1.02323e-17	4	0.0125
	S	TCC	-0.0708907	1.19252e-16	6	0.00833333
	D	GAC	-0.185026	3.42972e-105	2	0.025
	Y	TAC	-0.143106	2.99386e-63	2	0.025
	A	GCC	-0.0991474	4.13147e-31	4	0.0125
	F	TTC	-0.223097	3.03216e-153	2	0.025
	H	CAC	-0.130909	3.88248e-53	2	0.025
Entodinium caudatum	Amino Acid	codons	r	p-value	family_number	p-value/n
	Y	TAT	-0.432275	0	2	0.025
	D	GAT	-0.402316	0	2	0.025
	Q	CAA	-0.278815	0	2	0.025
	R	AGA	-0.465146	0	6	0.00833333
	I	ATA	-0.202838	0	3	0.0166667
	N	AAT	-0.431439	0	2	0.025
	T	ACA	-0.118961	1.15191e-139	4	0.0125
	K	AAA	-0.268159	0	2	0.025
	P	CCA	-0.0262296	3.23277e-08	4	0.0125
	S	TCA	-0.1925	0	6	0.00833333
	C	TGT	-0.205877	0	2	0.025
	E	GAA	-0.254387	0	2	0.025
	F	TTT	-0.440223	0	2	0.025
	H	CAT	-0.252154	0	2	0.025
	G	GGA	-0.283156	0	4	0.0125
	A	GCA	-0.121707	3.83584e-146	4	0.0125
	L	TTA	-0.40209	0	6	0.00833333
	V	GTA	-0.140669	5.02735e-195	4	0.0125
Tetrahymena borealis	Amino Acid	codons	r	p-value	family_number	p-value/n
	A	GCT	-0.296224	0	4	0.0125
	R	AGA	-0.506988	0	6	0.00833333
	S	TCT	-0.174225	3.47067e-143	6	0.00833333
	H	CAT	-0.023135	0.000785947	2	0.025
	D	GAT	-0.134896	4.25955e-86	2	0.025
	Q	CAA	-0.373392	0	2	0.025
	E	GAA	-0.376542	0	2	0.025
	L	TTA	-0.164994	2.03002e-128	6	0.00833333
	K	AAG	-0.0613678	4.93045e-19	2	0.025
	T	ACT	-0.245176	7.24214e-286	4	0.0125
	V	GTT	-0.268979	0	4	0.0125
	G	GGT	-0.195847	3.95576e-181	4	0.0125
	I	ATT	-0.24966	1.10033e-296	3	0.0166667
	P	CCT	-0.177718	5.37522e-149	4	0.0125
	Y	TAT	-0.0449936	6.46505e-11	2	0.025
	F	TTC	-0.0448474	7.44918e-11	2	0.025
Tetrahymena elliotti	Amino Acid	codons	r	p-value	family_number	p-value/n
	G	GGT	-0.129004	1.02637e-80	4	0.0125
	H	CAT	-0.0548251	7.73265e-16	2	0.025
	N	AAT	-0.0546727	9.28742e-16	2	0.025
	T	ACT	-0.199242	4.89001e-192	4	0.0125
	Q	CAA	-0.335006	0	2	0.025
	S	TCT	-0.148355	2.05729e-106	6	0.00833333
	K	AAG	-0.0237549	0.000484047	2	0.025
	Y	TAT	-0.0731806	5.16678e-27	2	0.025
	E	GAA	-0.2848	0	2	0.025
	V	GTT	-0.217431	3.43445e-229	4	0.0125
	A	GCT	-0.184209	5.70965e-164	4	0.0125
	P	CCT	-0.147273	7.0564e-105	4	0.0125
	D	GAT	-0.131139	2.27578e-83	2	0.025
	I	ATT	-0.19166	1.38597e-177	3	0.0166667
	R	AGA	-0.466244	0	6	0.00833333
	L	TTA	-0.171565	3.55209e-142	6	0.00833333
Tetrahymena malaccensis	Amino Acid	codons	r	p-value	family_number	p-value/n
	H	CAT	-0.0545885	3.35326e-18	2	0.025
	P	CCT	-0.101899	1.66039e-59	4	0.0125
	G	GGT	-0.129185	8.39139e-95	4	0.0125
	D	GAT	-0.190745	2.27231e-206	2	0.025
	L	TTA	-0.247777	0	6	0.00833333
	Q	CAA	-0.297988	0	2	0.025
	I	ATT	-0.181863	1.80002e-187	3	0.0166667
	E	GAA	-0.288607	0	2	0.025
	N	AAT	-0.155565	4.17744e-137	2	0.025
	R	AGA	-0.431798	0	6	0.00833333
	T	ACT	-0.156916	1.71986e-139	4	0.0125
	A	GCT	-0.150723	9.90145e-129	4	0.0125
	V	GTT	-0.172765	4.15194e-169	4	0.0125
	Y	TAT	-0.152375	1.48096e-131	2	0.025
	F	TTT	-0.0916206	2.09765e-48	2	0.025
	S	TCT	-0.0773491	5.86224e-35	6	0.00833333
	K	AAA	-0.126442	7.22783e-91	2	0.025
Tetrahymena thermophila	Amino Acid	codons	r	p-value	family_number	p-value/n
	F	TTT	-0.0807222	1.18187e-37	2	0.025
	G	GGT	-0.114918	1.00532e-74	4	0.0125
	I	ATT	-0.155455	7.03521e-136	3	0.0166667
	S	TCT	-0.0752907	5.7652e-33	6	0.00833333
	D	GAT	-0.156503	1.02992e-137	2	0.025
	V	GTT	-0.143888	1.71263e-116	4	0.0125
	N	AAT	-0.151064	2.4568e-128	2	0.025
	R	AGA	-0.390898	0	6	0.00833333
	Q	CAA	-0.272152	0	2	0.025
	P	CCT	-0.0745295	2.46481e-32	4	0.0125
	H	CAT	-0.091782	3.27042e-48	2	0.025
	A	GCT	-0.127765	4.64294e-92	4	0.0125
	L	TTA	-0.192768	3.26125e-209	6	0.00833333
	T	ACT	-0.109055	1.95677e-67	4	0.0125
	Y	TAT	-0.129922	3.72674e-95	2	0.025
	E	GAA	-0.262664	0	2	0.025
	K	AAA	-0.0555787	1.11506e-18	2	0.025
Ichthyophthirius multifiliis	Amino Acid	codons	r	p-value	family_number	p-value/n
	L	TTA	-0.383467	2.77663e-265	6	0.00833333
	D	GAT	-0.310534	6.8344e-170	2	0.025
	V	GTT	-0.229093	3.00265e-91	4	0.0125
	R	AGA	-0.502486	0	6	0.00833333
	H	CAT	-0.191529	7.84245e-64	2	0.025
	A	GCT	-0.109002	1.44528e-21	4	0.0125
	C	TGT	-0.0950752	9.24408e-17	2	0.025
	P	CCT	-0.165612	5.82245e-48	4	0.0125
	I	ATT	-0.160563	3.76167e-45	3	0.0166667
	Q	CAA	-0.125218	5.41915e-28	2	0.025
	Y	TAT	-0.277632	8.21757e-135	2	0.025
	T	ACT	-0.110467	4.13072e-22	4	0.0125
	K	AAA	-0.223278	1.17994e-86	2	0.025
	F	TTT	-0.223374	9.92946e-87	2	0.025
	N	AAT	-0.225647	1.64414e-88	2	0.025
	E	GAA	-0.284083	2.52256e-141	2	0.025
	G	GGA	-0.230884	1.08647e-92	4	0.0125
	S	TCA	-0.0763267	2.57182e-11	6	0.00833333
Pseudocohnilembus persalinus	Amino Acid	codons	r	p-value	family_number	p-value/n
	T	ACT	-0.155283	6.59623e-72	4	0.0125
	R	AGA	-0.421421	0	6	0.00833333
	E	GAA	-0.235784	6.70884e-166	2	0.025
	D	GAT	-0.242191	3.338e-175	2	0.025
	N	AAT	-0.171049	4.52252e-87	2	0.025
	H	CAT	-0.1065	1.50473e-34	2	0.025
	K	AAA	-0.193673	1.50968e-111	2	0.025
	P	CCT	-0.176786	5.66393e-93	4	0.0125
	S	TCT	-0.119682	3.06605e-43	6	0.00833333
	V	GTT	-0.212362	3.11536e-134	4	0.0125
	F	TTT	-0.0785899	1.6469e-19	2	0.025
	C	TGT	-0.133225	3.0325e-53	2	0.025
	L	TTA	-0.408246	0	6	0.00833333
	Y	TAT	-0.183441	4.45713e-100	2	0.025
	G	GGA	-0.251537	2.81276e-189	4	0.0125
	Q	CAA	-0.235771	7.00616e-166	2	0.025
	I	ATT	-0.133085	3.89279e-53	3	0.0166667
	A	GCT	-0.136521	7.59555e-56	4	0.0125
Uronema marinum	Amino Acid	codons	r	p-value	family_number	p-value/n
	L	TTA	-0.358134	0	6	0.00833333
	R	AGA	-0.407907	0	6	0.00833333
	C	TGT	-0.19591	1.77105e-194	2	0.025
	K	AAA	-0.195726	4.15097e-194	2	0.025
	N	AAT	-0.124748	4.05934e-79	2	0.025
	Y	TAT	-0.197923	1.56484e-198	2	0.025
	E	GAA	-0.209487	1.07527e-222	2	0.025
	Q	CAA	-0.141842	5.85916e-102	2	0.025
	I	ATT	-0.100143	1.68908e-51	3	0.0166667
	T	ACT	-0.19301	1.02505e-188	4	0.0125
	S	TCT	-0.165706	6.049e-139	6	0.00833333
	G	GGA	-0.133745	9.20124e-91	4	0.0125
	F	TTT	-0.0772015	3.01332e-31	2	0.025
	D	GAT	-0.20293	8.24197e-209	2	0.025
	H	CAT	-0.151904	8.02813e-117	2	0.025
	A	GCT	-0.265006	0	4	0.0125
	V	GTT	-0.102484	7.30554e-54	4	0.0125
	P	CCT	-0.339509	0	4	0.0125
Paramecium biaurelia	Amino Acid	codons	r	p-value	family_number	p-value/n
	D	GAT	-0.251558	0	2	0.025
	V	GTT	-0.167722	5.02e-229	4	0.0125
	I	ATT	-0.119461	2.22e-116	3	0.0166667
	P	CCA	-0.147942	4.29e-178	4	0.0125
	C	TGT	-0.141584	3.89e-163	2	0.025
	L	TTA	-0.310166	0	6	0.00833333
	Y	TAT	-0.257445	0	2	0.025
	S	TCA	-0.167019	4.23e-227	6	0.00833333
	H	CAT	-0.230347	0	2	0.025
	K	AAA	-0.0463463	7.33e-19	2	0.025
	T	ACA	-0.173959	1.75e-246	4	0.0125
	N	AAT	-0.24224	0	2	0.025
	G	GGA	-0.215605	0	4	0.0125
	Q	CAA	-0.259837	0	2	0.025
	E	GAA	-0.154376	6.31e-194	2	0.025
	A	GCA	-0.0890081	3e-65	4	0.0125
	R	AGA	-0.505879	0	6	0.00833333
	F	TTT	-0.155009	1.6e-195	2	0.025
Paramecium caudatum	Amino Acid	codons	r	p-value	family_number	p-value/n
	P	CCA	-0.249214	8.08278e-245	4	0.0125
	N	AAT	-0.361168	0	2	0.025
	D	GAT	-0.325887	0	2	0.025
	Q	CAA	-0.288429	0	2	0.025
	C	TGT	-0.191062	7.41757e-143	2	0.025
	S	TCA	-0.264529	1.05708e-276	6	0.00833333
	R	AGA	-0.568208	0	6	0.00833333
	H	CAT	-0.307072	0	2	0.025
	G	GGA	-0.261579	2.15345e-270	4	0.0125
	A	GCA	-0.182384	3.87187e-130	4	0.0125
	I	ATT	-0.124238	7.26236e-61	3	0.0166667
	E	GAA	-0.30653	0	2	0.025
	F	TTT	-0.252231	6.27664e-251	2	0.025
	Y	TAT	-0.368095	0	2	0.025
	K	AAA	-0.240267	3.46832e-227	2	0.025
	V	GTT	-0.218304	6.13054e-187	4	0.0125
	L	TTA	-0.452565	0	6	0.00833333
	T	ACA	-0.294047	0	4	0.0125
Paramcium tetraurelia	Amino Acid	codons	r	p-value	family_number	p-value/n
	V	GTT	-0.137235	1.46e-161	4	0.0125
	Q	CAA	-0.241389	0	2	0.025
	G	GGA	-0.201548	0	4	0.0125
	E	GAA	-0.238424	0	2	0.025
	N	AAT	-0.200936	0	2	0.025
	K	AAA	-0.23391	0	2	0.025
	T	ACA	-0.0995977	1.2e-85	4	0.0125
	Y	TAT	-0.228078	0	2	0.025
	D	GAT	-0.198633	0	2	0.025
	R	AGA	-0.396193	0	6	0.00833333
	A	GCA	-0.0477237	6.61e-21	4	0.0125
	P	CCA	-0.0870896	7.5e-66	4	0.0125
	H	CAT	-0.167405	1.66e-240	2	0.025
	L	TTA	-0.332443	0	6	0.00833333
	S	TCA	-0.133983	5.05e-154	6	0.00833333
	F	TTT	-0.195508	0	2	0.025
	C	TGT	-0.0329301	9.78e-11	2	0.025
	I	ATT	-0.105682	2.99e-96	3	0.0166667

## Sheet: Table S6
Table S6. The third position codon bias of the 21 ciliate species.
species	AT-bias	SD	GC-bias	SD
Stentor roeselii	0.4861	0.0802	0.438	0.0989
Stentor coeruleus	0.4926	0.0604	0.4548	0.1118
Euplotes vannus	0.5245	0.0898	0.4475	0.0953
Euplotes octocarinatus	0.5107	0.0474	0.466	0.0938
Strombidium stylifer	0.5083	0.0716	0.5835	0.099
Halteria grandinella	0.4757	0.065	0.4315	0.0788
Stylonychia lemnae	0.4722	0.043	0.4379	0.088
Oxytricha trifallax	0.4832	0.0424	0.4177	0.0794
Pseudokeronopsis flava	0.4974	0.0733	0.4721	0.0875
Pseudokeronopsis carnea	0.4762	0.0749	0.4439	0.0822
Entodinium caudatum	0.4959	0.06	0.4373	0.1121
Tetrahymena borealis	0.4386	0.0601	0.3808	0.1029
Tetrahymena elliotti	0.4509	0.066	0.3736	0.1006
Tetrahymena malaccensis	0.4556	0.058	0.3689	0.01
Tetrahymena thermophila	0.4534	0.0605	0.3741	0.1043
Ichthyophthirius multifiliis	0.4805	0.0681	0.4203	0.1432
Pseudocohnilembus persalinus	0.4865	0.0603	0.3928	0.1536
Uronema marinum	0.4789	0.0637	0.3882	0.2
Paramecium biaurelia	0.4938	0.0478	0.4848	0.1226
Paramecium caudatum	0.5086	0.053	0.474	0.1268
Paramcium tetraurelia	0.5059	0.0577	0.4571	0.1212
